# Supplementary material for: Structure Based Discovery of Small Molecules to Regulate the Activity of Human Insulin Degrading Enzyme
Source: PubMed Central journal article supplement (PMC3280214; doi:10.1371/journal.pone.0031787), 2012-02-15
Supplement: pone.0031787.s008.pdf [file pone.0031787.s008.pdf]

**Figure S8.** Molecular structure of the compounds.

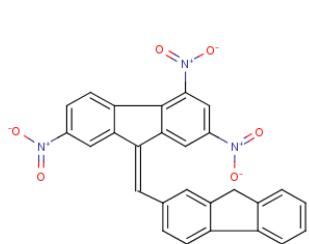

D1

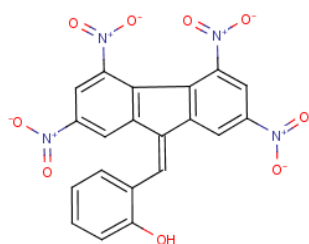

D2

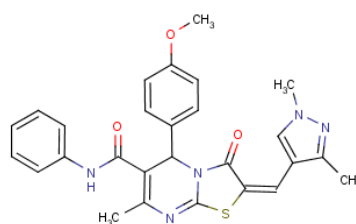

D3

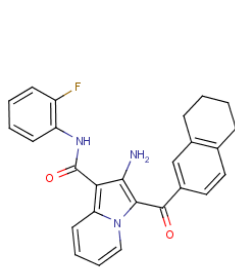

D4

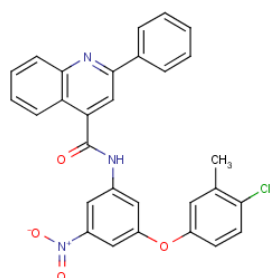

D5

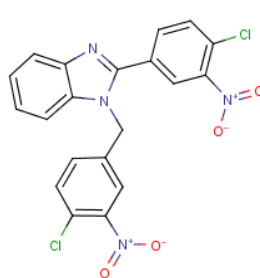

D6

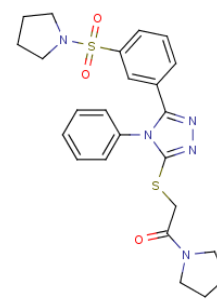

D7

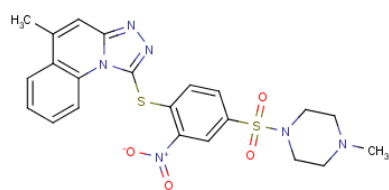

D8

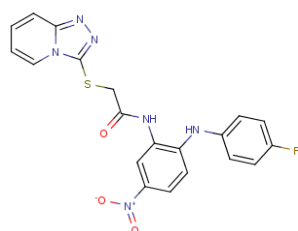

D9

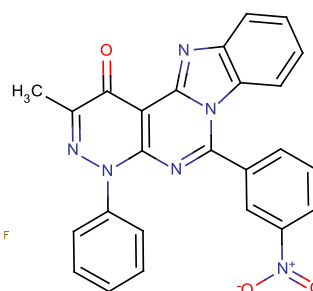

D10
